# Supplementary material for: Effect of Camel Peptide on the Biofilm of Staphylococcus epidermidis and Staphylococcus haemolyticus Formed on Orthopedic Implants
Source: MDPI journal article supplement (doi:10.3390/antibiotics12121671), 2023-11-28
Supplement: s1 [file s1]

# Effect of Camel Peptide on the Biofilm of *Staphylococcus epidermidis* and *Staphylococcus haemolyticus* Formed on Orthopedic Implants

Joanna Nowicka <sup>1,\*</sup>, Adriana Janczura <sup>1,\*</sup>, Magdalena Pajczkowska <sup>1</sup>, Grzegorz Chodaczek <sup>2</sup>,  
 Patrycja Szymczyk-Ziółkowska <sup>3</sup>, Urszula Walczuk <sup>1</sup> and Grażyna Gościński <sup>1</sup>

<sup>1</sup> Department of Microbiology, Faculty of Medicine, Medical University, 50-368 Wrocław, Poland; magdalena.pajczkowska@umw.edu.pl (M.P.); urszula.walczuk@umw.edu.pl (U.W.); grazyna.gosciński@umw.edu.pl (G.G.)

<sup>2</sup> Bioimaging Laboratory, Łukasiewicz Research Network—PORT Polish Center for Technology Development, 54-066 Wrocław, Poland; grzegorz.chodaczek@port.lukasiewicz.gov.pl

<sup>3</sup> Centre for Advanced Manufacturing Technologies (CAMT/FPC), Faculty of Mechanical Engineering, Wrocław University of Science and Technology, Łukasiewicza 5, 50-371 Wrocław, Poland; patrycja.e.szymczyk@pwr.edu.pl

\* Correspondence: joanna.nowicka@umw.edu.pl (J.N.); adriana.janczura@umw.edu.pl (A.J.)

**Table S1.** Methicillin resistance among *S. epidermidis* and *S. haemolyticus* strains.

| Strain number | <i>S. epidermidis</i> | <i>S. haemolyticus</i> |
|---------------|-----------------------|------------------------|
| 1             | Resistant             | Resistant              |
| 2             | Sensitive             | Sensitive              |
| 3             | Sensitive             | Sensitive              |
| 4             | Sensitive             | Resistant              |
| 5             | Sensitive             | Resistant              |
| 6             | Sensitive             | Resistant              |
| 7             | Resistant             | Resistant              |
| 8             | Sensitive             | Resistant              |
| 9             | Resistant             | Resistant              |
| 10            | Resistant             | Resistant              |
| 11            | Resistant             | Resistant              |
| 12            | Sensitive             | Resistant              |
| 13            | Sensitive             | Resistant              |
| 14            | Resistant             | Sensitive              |
| 15            | Resistant             | Resistant              |
| 16            | Sensitive             | Resistant              |
| 17            | Resistant             | Resistant              |
| 18            | Resistant             | Resistant              |
| 19            | Sensitive             | Resistant              |
| 20            | Sensitive             | Sensitive              |
| 21            | Sensitive             | Resistant              |
| 22            | Sensitive             | Resistant              |
| 23            | Sensitive             | Resistant              |
| 24            | Sensitive             | Resistant              |
| 25            | Resistant             | Resistant              |
| 26            | Resistant             | Resistant              |
| 27            | Resistant             | Resistant              |

|    |           |           |
|----|-----------|-----------|
| 28 | Sensitive | Resistant |
| 29 | Sensitive | Resistant |
| 30 | Sensitive | Resistant |
| 31 | Resistant | Resistant |
| 32 | Resistant | Resistant |
| 33 | Sensitive | Resistant |
| 34 | Resistant | Resistant |
| 35 | Sensitive | Resistant |
| 36 | Sensitive | Resistant |
| 37 | Sensitive | Resistant |
| 38 | Resistant | Resistant |
| 39 | Resistant | Resistant |
| 40 | Sensitive | Resistant |
| 41 | Sensitive | Resistant |
| 42 | Sensitive | Resistant |
| 43 | Sensitive | Resistant |
| 44 | Resistant | Resistant |
| 45 | Sensitive | Sensitive |
| 46 | Resistant | Resistant |
| 47 | Sensitive | Resistant |
| 48 | Sensitive | Resistant |
| 49 | Sensitive | Resistant |
| 50 | Sensitive | Resistant |
| 51 | Sensitive | Resistant |
| 52 | Sensitive | Resistant |
| 53 | Sensitive | Resistant |
| 54 | Resistant | Resistant |
| 55 | Resistant | Resistant |
| 56 | Sensitive | Sensitive |
| 57 | Sensitive | Sensitive |
| 58 | Sensitive | Resistant |
| 59 | Resistant | Resistant |
| 60 | Sensitive | Resistant |
| 61 | Sensitive |           |

**Table S2.** MIC and MBEC of Camel peptide in respect of *S. epidermidis* strains.

| Strain number | MIC (µg/mL) | MBEC (µg/mL) |
|---------------|-------------|--------------|
| 1             | 8           | 256          |
| 2             | 8           | 64           |
| 3             | 8           | 32           |
| 4             | 32          | > 256        |
| 5             | 32          | > 256        |
| 6             | 32          | 256          |
| 7             | 16          | 64           |
| 8             | 16          | 256          |
| 9             | 16          | > 256        |
| 10            | 8           | 128          |
| 11            | 8           | 32           |
| 12            | 2           | 32           |

---

|    |    |       |
|----|----|-------|
| 13 | 8  | 16    |
| 14 | 2  | 32    |
| 15 | 8  | 32    |
| 16 | 8  | 256   |
| 17 | 16 | 256   |
| 18 | 8  | 256   |
| 19 | 4  | 16    |
| 20 | 2  | 32    |
| 21 | 2  | 16    |
| 22 | 8  | 32    |
| 23 | 8  | 32    |
| 24 | 8  | 64    |
| 25 | 8  | 32    |
| 26 | 4  | 4     |
| 27 | 8  | 16    |
| 28 | 8  | 16    |
| 29 | 8  | 32    |
| 30 | 8  | 32    |
| 31 | 16 | 32    |
| 32 | 8  | 32    |
| 33 | 16 | 64    |
| 34 | 16 | 64    |
| 35 | 16 | 256   |
| 36 | 8  | 32    |
| 37 | 8  | 32    |
| 38 | 8  | 125   |
| 39 | 16 | 32    |
| 40 | 16 | 16    |
| 41 | 16 | 256   |
| 42 | 16 | 64    |
| 43 | 8  | 32    |
| 44 | 16 | 32    |
| 45 | 8  | 32    |
| 46 | 8  | 64    |
| 47 | 8  | 128   |
| 48 | 8  | 256   |
| 49 | 8  | 256   |
| 50 | 8  | 128   |
| 51 | 4  | 16    |
| 52 | 4  | 256   |
| 53 | 4  | 256   |
| 54 | 16 | 256   |
| 55 | 8  | 32    |
| 56 | 32 | > 256 |
| 57 | 16 | 128   |
| 58 | 8  | 32    |
| 59 | 32 | 64    |
| 60 | 4  | 16    |
| 61 | 4  | 8     |

**Table S3.** MIC and MBEC of Camel peptide in respect of *S. haemolyticus* strains.

| Strain number | MIC (µg/mL) | MBEC (µg/mL) |
|---------------|-------------|--------------|
| 1             | 4           | 16           |
| 2             | 4           | 16           |
| 3             | 4           | 32           |
| 4             | 2           | 8            |
| 5             | 8           | 64           |
| 6             | 4           | 16           |
| 7             | 4           | 16           |
| 8             | 2           | 32           |
| 9             | 2           | 16           |
| 10            | 2           | 8            |
| 11            | 8           | 128          |
| 12            | 4           | 16           |
| 13            | 4           | 16           |
| 14            | 8           | 128          |
| 15            | 4           | 32           |
| 16            | 2           | 16           |
| 17            | 4           | 16           |
| 18            | 4           | 16           |
| 19            | 4           | 8            |
| 20            | 2           | 16           |
| 21            | 4           | 64           |
| 22            | 4           | 16           |
| 23            | 4           | 16           |
| 24            | 4           | 16           |
| 25            | 4           | 16           |
| 26            | 4           | 16           |
| 27            | 4           | 16           |
| 28            | 4           | 8            |
| 29            | 2           | 64           |
| 30            | 4           | 16           |
| 31            | 2           | 16           |
| 32            | 2           | 16           |
| 33            | 4           | 64           |
| 34            | 4           | 16           |
| 35            | 2           | 16           |
| 36            | 8           | 128          |
| 37            | 8           | 128          |
| 38            | 16          | 16           |
| 39            | 16          | 128          |
| 40            | 32          | 128          |
| 41            | 16          | 32           |
| 42            | 16          | 128          |
| 43            | 16          | 64           |
| 44            | 2           | 64           |
| 45            | 2           | 16           |
| 46            | 2           | 16           |

|    |    |     |
|----|----|-----|
| 47 | 4  | 16  |
| 48 | 2  | 4   |
| 49 | 2  | 16  |
| 50 | 8  | 32  |
| 51 | 4  | 8   |
| 52 | 4  | 8   |
| 53 | 2  | 128 |
| 54 | 16 | 128 |
| 55 | 2  | 16  |
| 56 | 4  | 32  |
| 57 | 4  | 8   |
| 58 | 4  | 16  |
| 59 | 2  | 8   |
| 60 | 2  | 8   |

**Table S4.** Quantitative evaluation (cfu/mL) of the ability to form biofilm for analyzed strains.

| Strain number | <i>S. epidermidis</i> | <i>S. haemolyticus</i> |
|---------------|-----------------------|------------------------|
| 1             | 1,8x10 <sup>7</sup> * | 3,4x10 <sup>6</sup> *  |
| 2             | 2x10 <sup>5</sup>     | 1,95x10 <sup>6</sup>   |
| 3             | 6,7x10 <sup>7</sup>   | 1,1x10 <sup>7</sup>    |
| 4             | 6,4x10 <sup>7</sup>   | 2,88x10 <sup>6</sup>   |
| 5             | 3,9x10 <sup>7</sup>   | 1,21x10 <sup>6</sup>   |
| 6             | 1,8x10 <sup>7</sup>   | 1,8x10 <sup>5</sup>    |
| 7             | 5,7x10 <sup>6</sup>   | 1,0x10 <sup>6</sup>    |
| 8             | 4,0x10 <sup>7</sup>   | 2,3x10 <sup>6</sup>    |
| 9             | 1,0x10 <sup>5</sup>   | 1,8x10 <sup>5</sup>    |
| 10            | 1,1x10 <sup>8</sup>   | 2,6x10 <sup>6</sup>    |
| 11            | 6,58x10 <sup>6</sup>  | 4,5x10 <sup>6</sup>    |
| 12            | 1,3x10 <sup>5</sup>   | 1,37x10 <sup>7</sup>   |
| 13            | 1,0x10 <sup>7</sup>   | 3,2x10 <sup>6</sup>    |
| 14            | 3,0x10 <sup>6</sup>   | 3,27x10 <sup>6</sup>   |
| 15            | 4,8x10 <sup>5</sup>   | 1,84x10 <sup>6</sup>   |
| 16            | 1,87x10 <sup>7</sup>  | 1,75x10 <sup>5</sup>   |
| 17            | 3,0x10 <sup>7</sup>   | 1,2x10 <sup>5</sup>    |
| 18            | 1,75x10 <sup>7</sup>  | 4,1x10 <sup>5</sup>    |
| 19            | 5,72x10 <sup>7</sup>  | 2,12x10 <sup>6</sup>   |
| 20            | 5,9x10 <sup>7</sup>   | 3,2x10 <sup>4</sup>    |
| 21            | 2,8x10 <sup>6</sup>   | 2,35x10 <sup>7</sup>   |
| 22            | 8,5x10 <sup>6</sup>   | 1,39x10 <sup>7</sup>   |
| 23            | 6,8x10 <sup>6</sup>   | 6,68x10 <sup>6</sup>   |
| 24            | 7,1x10 <sup>6</sup>   | 2,5x10 <sup>6</sup>    |
| 25            | 9,0x10 <sup>5</sup>   | 7,58x10 <sup>6</sup>   |
| 26            | 2,68x10 <sup>7</sup>  | 1,02x10 <sup>7</sup>   |
| 27            | 1,65x10 <sup>7</sup>  | 7x10 <sup>5</sup>      |
| 28            | 1,36x10 <sup>7</sup>  | 1,42x10 <sup>7</sup>   |
| 29            | 2,96x10 <sup>7</sup>  | 6,4x10 <sup>6</sup>    |
| 30            | 9,95x10 <sup>6</sup>  | 4,3x10 <sup>6</sup>    |
| 31            | 1,09x10 <sup>7</sup>  | 3,0x10 <sup>6</sup>    |
| 32            | 1,48x10 <sup>7</sup>  | 44,0x10 <sup>6</sup>   |

|        |                    |                    |
|--------|--------------------|--------------------|
| 33     | $2,1 \times 10^7$  | $6,8 \times 10^6$  |
| 34     | $5,29 \times 10^7$ | $8,9 \times 10^6$  |
| 35     | $1,32 \times 10^9$ | $2,5 \times 10^6$  |
| 36     | $1,59 \times 10^7$ | $4,9 \times 10^6$  |
| 37     | $1,8 \times 10^6$  | $1,5 \times 10^6$  |
| 38     | $6,23 \times 10^6$ | $5,16 \times 10^6$ |
| 39     | $5,0 \times 10^5$  | $2,5 \times 10^7$  |
| 40     | $1,1 \times 10^7$  | $6,24 \times 10^6$ |
| 41     | $1,9 \times 10^6$  | $2,62 \times 10^6$ |
| 42     | $2,38 \times 10^6$ | $2,6 \times 10^6$  |
| 43     | $4,41 \times 10^6$ | $7,5 \times 10^6$  |
| 44     | $1,74 \times 10^6$ | $3,4 \times 10^7$  |
| 45     | $4,14 \times 10^6$ | $2,67 \times 10^6$ |
| 46     | $7,0 \times 10^5$  | $5,1 \times 10^5$  |
| 47     | $4,1 \times 10^5$  | $3,2 \times 10^6$  |
| 48     | $3,4 \times 10^6$  | $4,0 \times 10^4$  |
| 49     | $2,91 \times 10^6$ | $3,2 \times 10^7$  |
| 50     | $2,0 \times 10^6$  | $6,8 \times 10^5$  |
| 51     | $1,32 \times 10^6$ | $6,6 \times 10^5$  |
| 52     | $2,5 \times 10^7$  | $2,68 \times 10^6$ |
| 53     | $2,49 \times 10^7$ | $2,3 \times 10^6$  |
| 54     | $6,2 \times 10^7$  | $1,1 \times 10^6$  |
| 55     | $3,72 \times 10^6$ | $3,8 \times 10^6$  |
| 56     | $7,92 \times 10^7$ | $2,3 \times 10^6$  |
| 57     | $2,43 \times 10^6$ | $2,3 \times 10^6$  |
| 58     | $7,86 \times 10^9$ | $1,2 \times 10^7$  |
| 59     | $6,87 \times 10^7$ | $1,28 \times 10^6$ |
| 60     | $3,24 \times 10^6$ | $3,12 \times 10^5$ |
| 61     | $1,85 \times 10^5$ |                    |
| RP 62A | $7,5 \times 10^7$  |                    |
